# Supplementary material
Source: PubMed Central journal article supplement (PMC3754132)
Supplement: JVI.00994-13_zjv999097991so2.pdf [file JVI.00994-13_zjv999097991so2.pdf]

Movie S1. Time lapse movie from which the data shown in Figure 6 were derived. Vero cells were transfected with a plasmid encoding mCherry-HSV-2-Us2. At 24 hours after transfection, live cells were imaged over 134 seconds at a rate of 2.2 fps using a confocal microscope. Signal is mCherry fluorescence. Arrows highlight two examples of Us2-containing vesicles emitting extended membrane tubules. Arrowhead points to the presumed location of the cells MTOC from which numerous Us2-labeled vesicles appear to traffic to and from.
